# Supplementary material for: A clinical and mechanistic study of topical borneol‐induced analgesia
Source: PubMed Central journal article supplement (PMC5452010; doi:10.15252/emmm.201607300), 2017-04-10
Supplement: EMMM-9-802-s001.pdf [file EMMM-9-802-s001.pdf]

# **A clinical and mechanistic study of topical borneol-induced analgesia**

Shu Wang, Dan Zhang, Jinsheng Hu, Qi Jia, Wei Xu, Deyuan Su, Hualing Song,  
Zhichun Xu, Jianmin Cui, Ming Zhou, Jian Yang and Jianru Xiao

## **Appendix**

Appendix Table S1

Appendix Table S1

|                 |                                                  | P value  |
|-----------------|--------------------------------------------------|----------|
| <b>Figure 2</b> |                                                  |          |
| 2A              | Ethanol + Saline VS Ethanol + Cap                | 1.13E-08 |
|                 | 25% Borneol + Cap VS Ethanol + Cap               | 4.36E-08 |
| 2B              | Ethanol + Saline VS Ethanol + Cap                | 3.91E-12 |
|                 | 25% Borneol + Cap VS Ethanol + Cap               | 6.98E-09 |
| 2C              | Phase 1                                          |          |
|                 | 1.5% Borneol VS 0% Borneol                       | 4.52E-03 |
|                 | 4.5% Borneol VS 0% Borneol                       | 1.59E-03 |
|                 | 15% Borneol VS 0% Borneol                        | 1.19E-04 |
|                 | Phase 2                                          |          |
|                 | 4.5% Borneol VS 0% Borneol                       | 1.59E-03 |
|                 | 15% Borneol VS 0% Borneol                        | 9.26E-05 |
| 2D              | Ethanol (Ipsilateral) VS borneol (Ipsilateral)   |          |
|                 | 1 day                                            | 4.11E-05 |
|                 | 2 day                                            | 4.77E-03 |
|                 | 3 day                                            | 3.93E-03 |
|                 | 7 day                                            | 3.00E-02 |
|                 | Ethanol (Ipsilateral) VS Ethanol (Contralateral) |          |
|                 | 1 day                                            | 8.59E-05 |
|                 | 2 day                                            | 9.44E-07 |
|                 | 3 day                                            | 7.43E-07 |
|                 | 7 day                                            | 2.53E-02 |
| 2E              | Ethanol + CFA VS Ethanol + Saline                |          |
|                 | 1 day                                            | 2.68E-03 |
|                 | 4 day                                            | 7.03E-06 |
|                 | 7day                                             | 2.77E-02 |
|                 | Ethanol + CFA VS Borneol + CFA                   |          |
|                 | 1 day                                            | 1.49E-02 |
|                 | 4 day                                            | 1.14E-02 |
| <b>Figure 3</b> |                                                  |          |
| 3A              | Ethanol + Saline VS Ethanol + Cap                | 1.33E-08 |
|                 | 15% Borneol + Cap VS Ethanol + Cap               | 1.41E-05 |
| 3B              | Ethanol + Saline VS Ethanol + Cap                | 1.91E-14 |
|                 | 15% Borneol + Cap VS Ethanol + Cap               | 6.76E-12 |
| 3C              | Borneol + CFA VS Ethanol + CFA                   |          |
|                 | 4 day                                            | 2.18E-02 |
|                 | 7 day                                            | 1.12E-02 |
|                 | Ethanol + CFA VS Ethanol + Saline                |          |

|    |                                    |          |
|----|------------------------------------|----------|
|    | 1 day                              | 4.47E-02 |
|    | 4 day                              | 6.54E-04 |
|    | 7 day                              | 1.61E-02 |
| 3D | Saline VS Bicuculline              | 2.70E-01 |
| 3E | Saline VS Bicuculline              | 9.70E-01 |
| 3F | Saline VS Muscimol                 | 4.53E-09 |
|    | Muscimol + Bicuculline VS Muscimol | 3.19E-04 |

### Figure 5

|    |                                                         |          |
|----|---------------------------------------------------------|----------|
| 5B | Phase 1                                                 |          |
|    | Ethanol (WT) VS Ethanol (TRPM8 <sup>-/-</sup> )         | 9.02E-01 |
|    | 15% Borneol (WT) VS 15% Borneol (TRPM8 <sup>-/-</sup> ) | 1.66E-02 |
|    | Phase 2                                                 |          |
|    | Ethanol (WT) VS Ethanol (TRPM8 <sup>-/-</sup> )         | 8.25E-01 |
|    | 15% Borneol (WT) VS 15% Borneol (TRPM8 <sup>-/-</sup> ) | 1.76E-03 |
| 5C | Ethanol (Ipsilateral) VS borneol (Ipsilateral)          |          |
|    | 1 day                                                   | 9.60E-01 |
|    | 2 day                                                   | 2.47E-01 |
|    | 3 day                                                   | 4.63E-01 |
|    | 7 day                                                   | 4.87E-01 |
|    | 10 day                                                  | 1.70E-01 |
|    | 14 day                                                  | 7.49E-01 |
| 5D | Ethanol + CFA VS Borneol+ CFA                           |          |
|    | 1 day                                                   | 6.77E-01 |
|    | 4 day                                                   | 5.87E-01 |
|    | 7 day                                                   | 5.41E-01 |
| 5F | Phase 1                                                 |          |
|    | Ethanol(Saline) VS Ethanol(AMTB)                        | 8.95E-01 |
|    | Borneol(Saline) VS Borneol(AMTB)                        | 1.45E-02 |
|    | Phase 2                                                 |          |
|    | Ethanol(Saline) VS Ethanol(AMTB)                        | 9.40E-01 |
|    | Borneol(Saline) VS Borneol(AMTB)                        | 5.48E-04 |

### Figure 6

|    |                            |          |
|----|----------------------------|----------|
| 6A | Ethanol VS 15% Borneol     | 2.44E-07 |
|    | Ethanol VS 15% Menthol     | 2.43E-07 |
|    | 15% Borneol VS 15% Menthol | 7.51E-01 |
| 6B | Phase 1                    |          |
|    | Ethanol VS 15% Borneol     | 7.15E-03 |
|    | Ethanol VS 15% Menthol     | 4.61E-03 |
|    | 15% Borneol VS 15% Menthol | 4.12E-01 |

|                 |                                    |          |
|-----------------|------------------------------------|----------|
|                 | Phase 2                            |          |
|                 | Ethanol VS 15% Borneol             | 1.55E-03 |
|                 | Ethanol VS 15% Menthol             | 4.11E-03 |
|                 | 15% Borneol VS 15% Menthol         | 7.31E-01 |
| 6C              | Ethanol + Saline VS Ethanol + Cap  | 2.80E-10 |
|                 | Ethanol + Cap VS 15% Bornoel + Cap | 9.30E-02 |
|                 | Ethanol + Cap VS 15% Menthol + Cap | 6.33E-05 |
| 6D              | Ethanol + CFA VS Ethanol + Saline  |          |
|                 | 1 day                              | 1.43E-02 |
|                 | 4 day                              | 7.50E-03 |
|                 | 7 day                              | 1.60E-02 |
|                 | Ethanol + CFA VS Menthol + CFA     |          |
|                 | 1 day                              | 1.73E-02 |
|                 | 4 day                              | 4.82E-02 |
| 6E              | Saline VS Naloxone                 | 5.27E-01 |
| 6F              | Saline VS Naloxone                 | 2.13E-03 |
| 6G              | Saline VS Naloxone                 | 5.56E-01 |
| 6H              | Saline VS Naloxone                 | 7.89E-01 |
| 6I              | Saline VS LY341495                 | 9.05E-01 |
| 6J              | Saline VS LY341495                 | 4.49E-03 |
| 6K              | Ethanol VS 15% Borneol             | 2.99E-01 |
|                 | Ethanol VS 15% Menthol             | 4.17E-04 |
| 6L              | Ethanol VS 15% Borneol             | 5.98E-01 |
|                 | Ethanol VS 15% Menthol             | 2.34E-05 |
| <b>Fig. EV4</b> | A Saline VS naloxone               | 4.70E-03 |
|                 | B Morphine VS Morphine + Naloxone  | 1.82E-06 |
| <b>Fig. EV5</b> | Ethanol VS 15% Menthol             | 5.40E-10 |
