# Supplementary material for: A clinical and mechanistic study of topical borneol‐induced analgesia
Source: EMBO Mol Med. 2017 Apr 10;9(6):802–15. doi: 10.15252/emmm.201607300 (PMC5452010; doi:10.15252/emmm.201607300)
Supplement: Supplementary file 2 — Expanded View Figures PDF [file EMMM-9-802-s002.pdf]

## Expanded View Figures

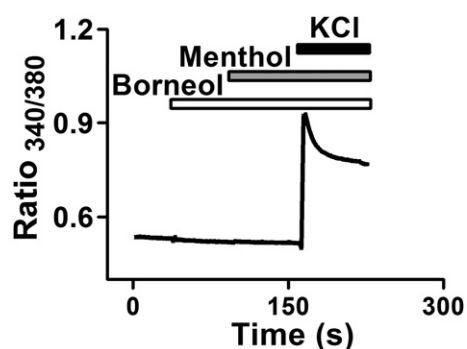

**Figure EV1. Borneol has no effect on DRG neurons from TRPM8<sup>-/-</sup> mice.** Averaged intracellular Ca<sup>2+</sup> increases in TRPM8<sup>-/-</sup> DRG neurons in response to consecutive applications of 200  $\mu$ M borneol, 200  $\mu$ M menthol, and 67 mM KCl. A total of 1,127 KCl-responsive neurons from four mice were included in the analysis, and none of the neurons responded to borneol.

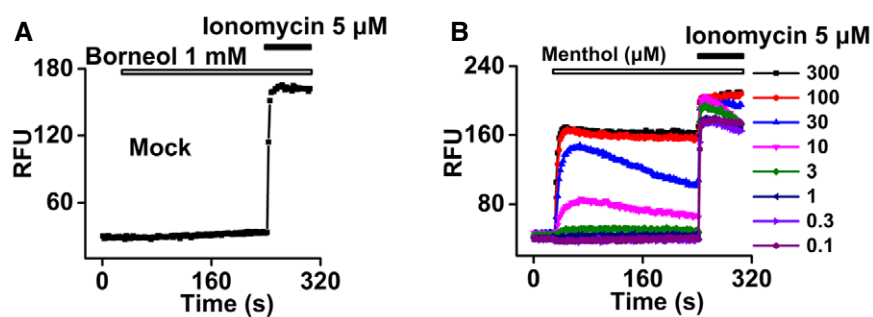

**Figure EV2. The borneol effect on mock-transfected HEK 293 cells and the menthol effect on TRPM8-expressing cells.**

- A Representative intracellular Ca<sup>2+</sup> signals in HEK 293 cells transfected with empty vector in response to borneol and subsequent applied Ca<sup>2+</sup> ionophore ionomycin ( $n = 6$ ).
- B Representative intracellular Ca<sup>2+</sup> signals in HEK 293 cells expressing hTRPM8 in response to different concentrations of menthol and the subsequently applied Ca<sup>2+</sup> ionophore ionomycin.

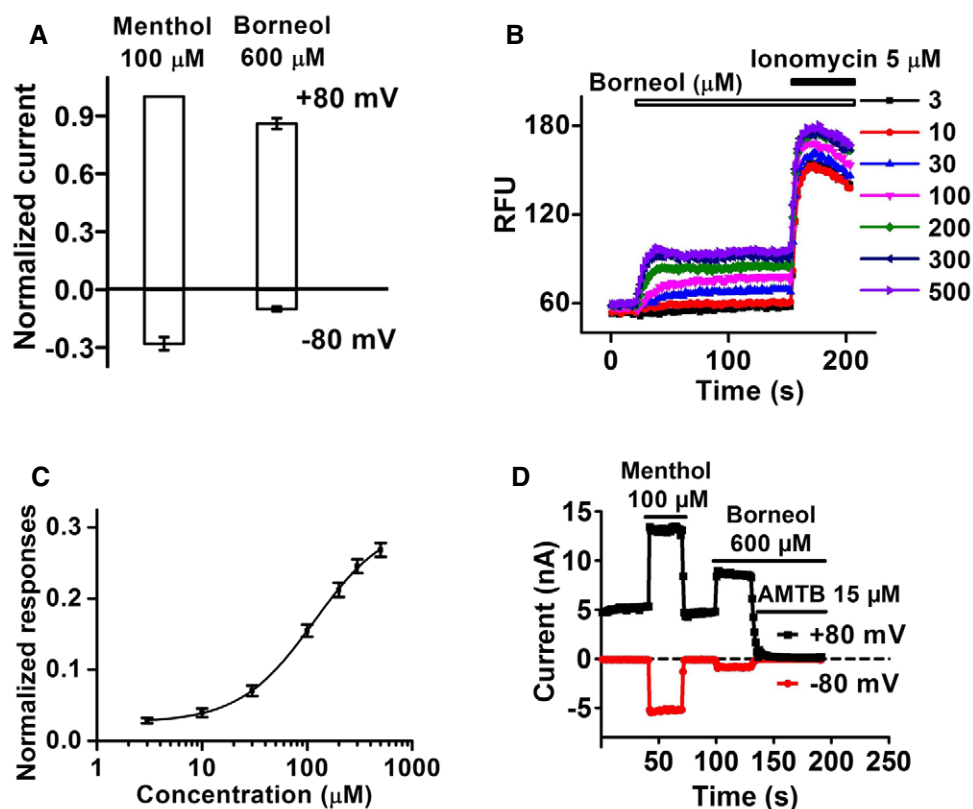

**Figure EV3. Borneol activates TRPM8.**

- A** Quantification of consecutively applied 100  $\mu$ M menthol- and 600  $\mu$ M borneol-induced hTRPM8 currents. Currents were normalized to 100  $\mu$ M menthol-induced currents at +80 mV ( $n = 6$ ).
- B** Representative intracellular  $\text{Ca}^{2+}$  signals in HEK 293 cells expressing mouse TRPM8 in response to different concentrations of borneol.
- C** Dose–response curves of borneol-induced increase in intracellular  $\text{Ca}^{2+}$  in mouse TRPM8-expressing HEK 293 cells. The smooth curve is a fit to the Hill equation with an  $\text{EC}_{50}$  of 116  $\mu$ M ( $n = 12$ ). The data were normalized to ionomycin-induced intracellular  $\text{Ca}^{2+}$  increases.
- D** Time course of menthol- and subsequently applied borneol-induced whole-cell currents in mouse TRPM8-expressing HEK 293 cells ( $n = 5$ ).
- Data information: All the data are presented as the mean  $\pm$  standard error of the mean (SEM).

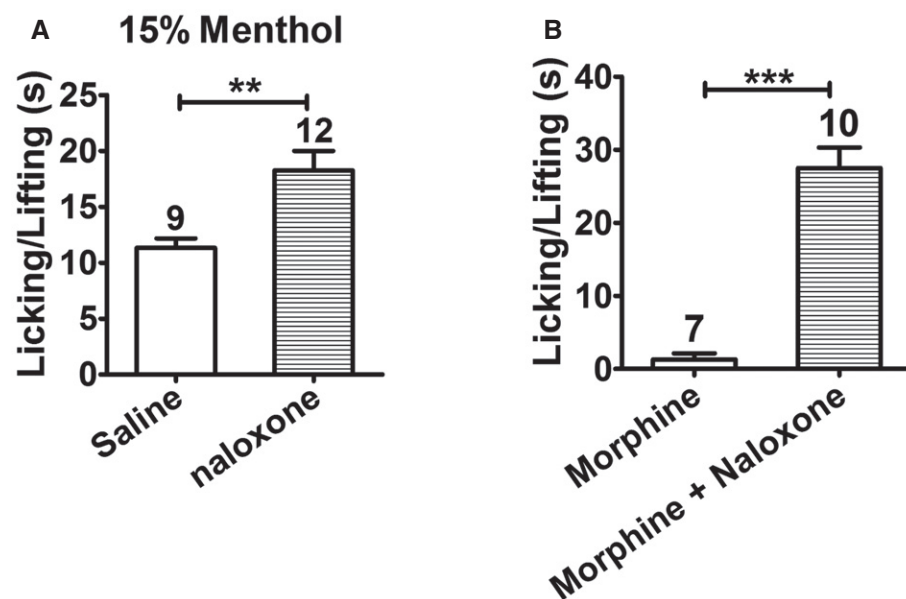

**Figure EV4. Intrathecal naloxone antagonizes menthol- or morphine-induced analgesia.**

A Quantification of the effect of intrathecal injection of naloxone on menthol-induced analgesia in TRPM8<sup>-/-</sup> mice. After control saline or naloxone was intrathecally injected in TRPM8<sup>-/-</sup> mice, 15% menthol was applied to a hindpaw for a total of three times. After 10 min, 100  $\mu$ M Cap was injected into the paw, and paw licking and lifting time was measured within 5 min.

B Quantification of 100  $\mu$ M Cap-induced nociceptive responses in WT mice after intrathecal injection of morphine with or without naloxone.

Data information: The number of mice is indicated on top of each bar. Statistical significance was evaluated using two-tailed *t*-test. \*\**P* < 0.01; \*\*\**P* < 0.001; the exact *P*-values are indicated in Appendix Table S1. All the data are presented as the mean  $\pm$  standard error of the mean (SEM).

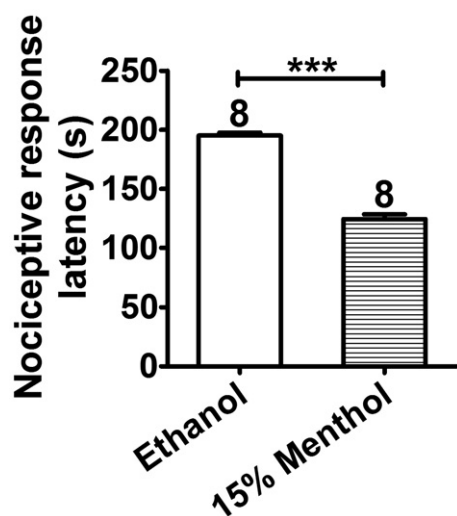

**Figure EV5. Menthol causes cold hypersensitivity in TRPM8<sup>-/-</sup> mice.**

Ethanol or menthol was applied to both hindpaws of TRPM8<sup>-/-</sup> mice, and the nociceptive response latencies were measured in a cold plate test (0°C). Statistical significance was evaluated using two-tailed *t*-test. \*\*\**P* < 0.001; the exact *P*-value is indicated in Appendix Table S1. The number of mice is indicated on top of each bar. All the data are presented as the mean  $\pm$  standard error of the mean (SEM).
